# Supplementary material for: New Smart Bioactive and Biomimetic Chitosan-Based Hydrogels for Wounds Care Management
Source: MDPI journal article supplement (doi:10.3390/pharmaceutics15030975), 2023-03-17
Supplement: s1 [file s1]

## 2.2. Methods

### 2.2.1. Synthesis of Oxidized Chitosan and Oxidized Hyaluronic Acid (oxCS, oxHA)

Chitosan (CS) and hyaluronic acid (HA) were oxidized using the periodate method, previously described in the literature [59,61]. Briefly, 1 g of polymers (CS, HA) were added to distilled water (1:100) and stirred at room temperature for 1 h. The sodium periodate solution ( $\text{NaIO}_4$ ) 10% (w/w) was prepared *ex tempore* and 14 mL were added gradually into each polymer dispersion. Each mixture was stirred for 3 h, under magnetic stirring with 200 rpm, in a dark environment, at room temperature. Additional maintaining of 48 h for CS and 24 h for HA, respectively, in dark conditions, at room temperature, was necessary to complete the reactions. Finally, 3 mL of ethylene glycol was added to remove the unreacted  $\text{NaIO}_4$  from each reaction. The purification of oxidized polymers was performed by dialysis against distilled water for five days, while the water was changed 3-4 times each day. Finally, oxCS and oxHA were lyophilized using a Christ freeze-dryer alpha 2-4 LSC at  $-50^\circ\text{C}$  and 0.4 mbar. The obtaining process of oxidized polymers (oxCS, oxHA) is illustrated in Figure 1.

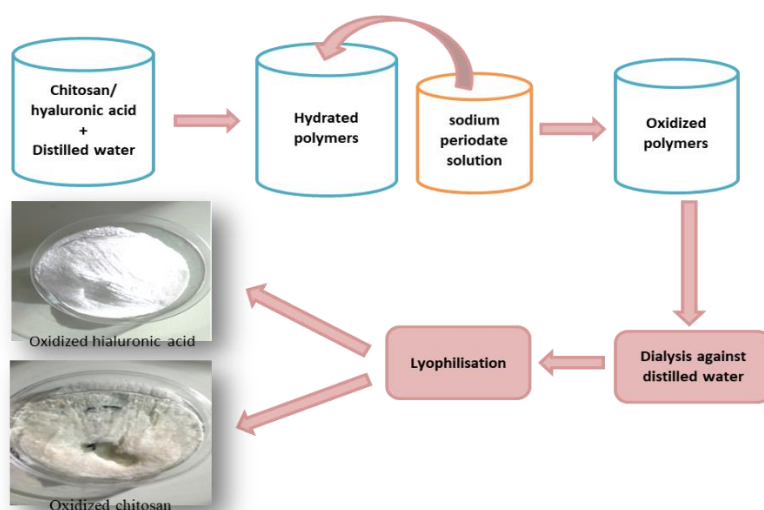

**Figure S1.** The obtaining process of oxCS and oxHA.

### 3.3. Physicochemical Characterization of Oxidized Polymers

#### FT-IR Spectroscopy

The native CS exhibits a large vibration band at  $3550\text{--}3200\text{ cm}^{-1}$  as a result of overlapping stretching vibration of  $-\text{OH}$  and primary amine ( $-\text{NH}_2$ ) groups. The peak around  $2920\text{ cm}^{-1}$  results from the stretching vibration of  $\text{C-H}$  and around  $1377\text{ cm}^{-1}$ , and the symmetric bending vibration of  $\text{C-H}$  was observed. The large band region within  $1072\text{--}895\text{ cm}^{-1}$  is assigned to the D-glucosamine backbone. The stretching vibration of  $\text{C=O}$  and the bending vibration of  $\text{N-H}$  in acetyl groups are indicated by the presence of peaks around  $1652\text{--}1555\text{ cm}^{-1}$  (Figure S2a) [73–75].

The spectra of oxCS show a new peak at  $1732\text{ cm}^{-1}$  characteristic for the carbonyl group ( $\text{C=O}$ ) stretch, compared with the spectra of native CS, which confirms that the oxidation reaction occurred properly. Also, the peak in the  $2924\text{--}2854\text{ cm}^{-1}$  range which appears as a

shoulder-type peak just to the right of the alkyl C–H stretches, is specific for the H–C=O stretch. During the oxidation process several intra- and intermolecular interactions could occur between unreacted -NH<sub>2</sub> groups and new C=O groups. These interactions result in the formation of a dynamic Schiff base, iminols, and/or hemiacetals, which could overlap the oxidation signals. According to scientific data, the IR spectra of the Schiff bases exhibit medium to strong intensity absorption bands in the range 1615–1650 cm<sup>-1</sup> as a consequence of C=N stretching vibrations [66,76].

For example, the new peak observed at 1620 cm<sup>-1</sup> indicates the presence of an imino bond (C=N) and the new sharp peak from 3259 cm<sup>-1</sup> in the O–H range, reconfirming the Schiff base presence and their possible tautomer iminol. The peak from 953–895 cm<sup>-1</sup> could be assigned to hemiacetals interactions, which may be formed under periodate oxidation [70,77,78].

Referring to native HA, this polymer has three functional groups: carboxyl (-COOH), hydroxyl (primary and secondary O–H), and N-acetyl group (acetamide). The structure of HA is quite similar to CS, except for the absence of the free -NH<sub>2</sub> group. After the oxidation of HA, new clear peaks at 1732 cm<sup>-1</sup> and at 2924–2854 cm<sup>-1</sup> range appear, which confirm the presence of the carbonyl group, and so the success of the oxidation reaction [61]. Since HA does not contain any free -NH<sub>2</sub> groups, the intra- and intermolecular Schiff base interactions did not occur, in contrast to oxCS. However, the formation of hemiacetals is sustained due to the new peak observed at 876 cm<sup>-1</sup> (Figure S2b)

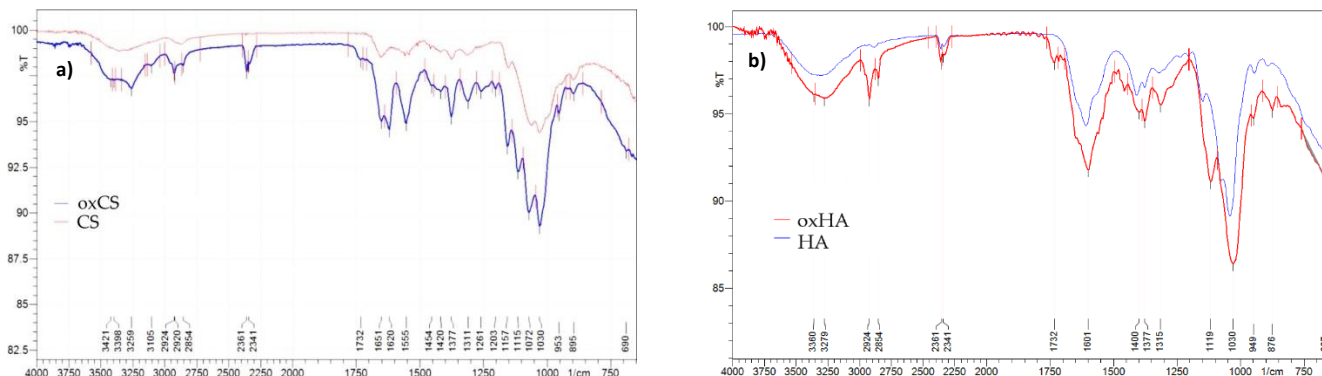

**Figure S2.** (a) FT-IR spectra of native (CS, HA) and (b) oxidized (oxCS, oxHA) polymers.

## NMR Spectroscopy

In the <sup>1</sup>H-NMR spectra of oxCS (Figure S3b) the lack of the signal from 3.094 ppm and the presence of a signal at 8.157 ppm, in reference with the <sup>1</sup>H-NMR spectra of native CS (Figure S3a), demonstrate that the oxidation took place [76,79]. In addition, the carbon signal at 165.64 ppm from the <sup>13</sup>C-NMR spectra of oxCS (Figure 6d), characteristic of the aldehyde group, strongly supports the structure of oxCS [80].

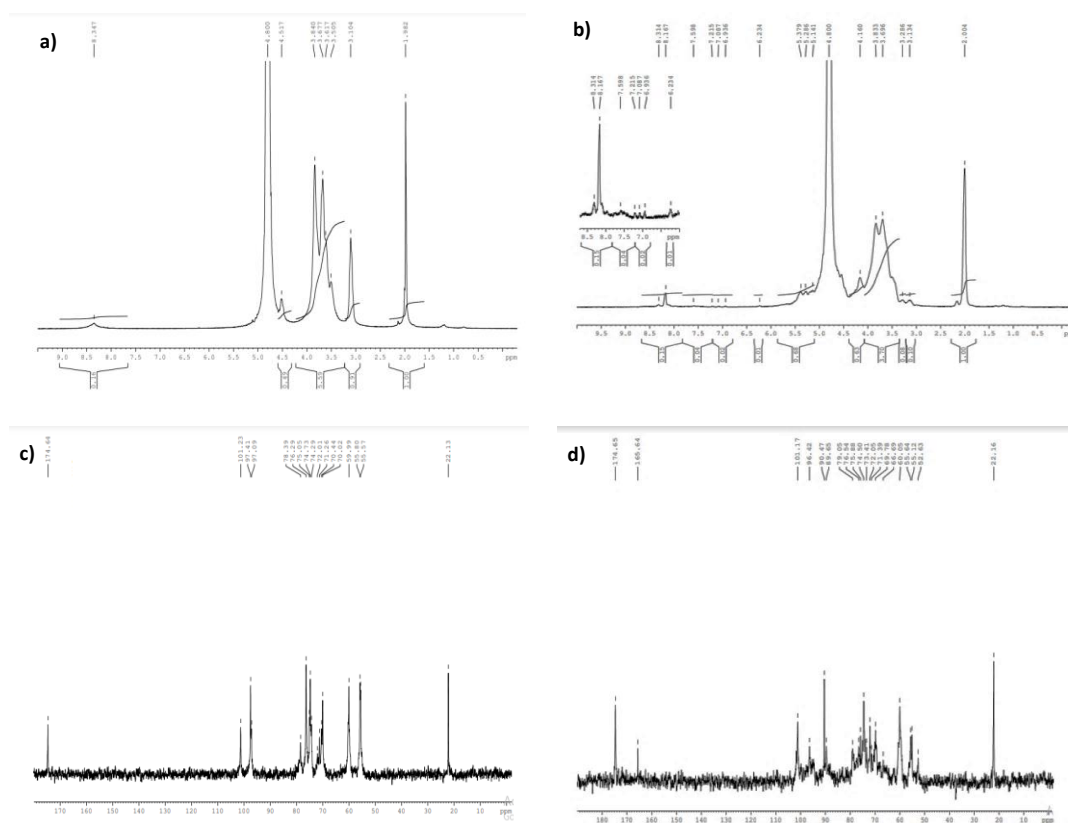

**Figure S3.** <sup>1</sup>H-NMR and <sup>13</sup>C-NMR spectra of CS (a, c) and oxCS (b, d).

For oxHA in the <sup>1</sup>H-NMR spectra (Figure S4b), the presence of aldehyde protons was confirmed by the appearance of chemical shifts between 8 and 9.5 ppm compared to the HA spectra (Figure S4a) [61,80]. Moreover, the carbon of the aldehyde group appears as a new signal at 173 ppm (Figure S4d), which indicates both sp<sup>2</sup> hybridization and the double bond between carbon and oxygen [32,33].

The oxidation degree for oxHA was 8.5%, quantified by comparing the integration ratio for the signal protons of the -CH<sub>3</sub> group and the aldehyde proton (C-H) [81]. In the case of oxCS, due to the intra- and intermolecular interactions described previously, the determination of oxidation degree through NMR spectroscopy was not properly quantified.

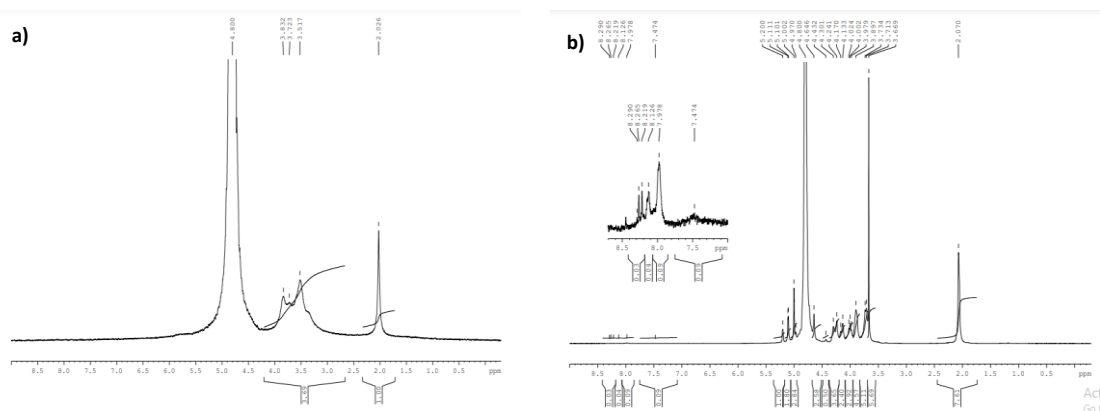

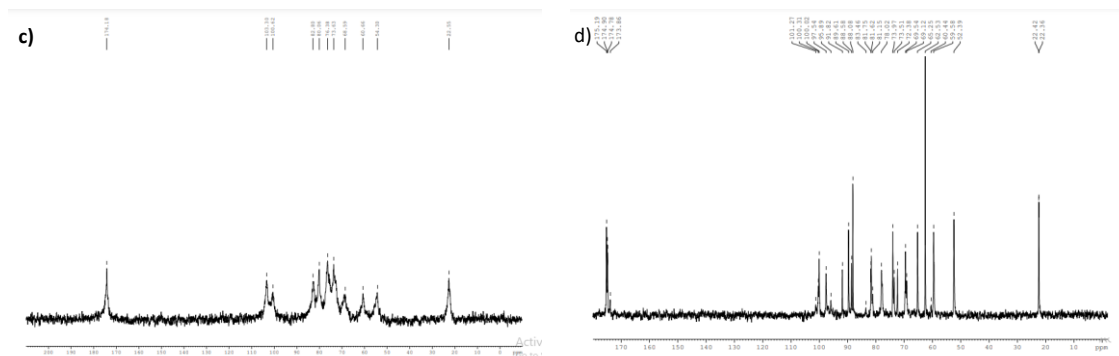

**Figure S4.**  $^1\text{H}$ -NMR and  $^{13}\text{C}$ -NMR spectra of HA (a, c) and oxHA (b, d).
